# Supplementary material for: Wrapping/unwrapping transition of double-stranded DNA in DNA–nanosphere complexes induced by multivalent anions
Source: Royal Society of Chemistry journal article supplement (doi:10.1039/c4sm00652f), 2014-01-01
Supplement: c4sm00652f1.pdf [file c4sm00652f1.pdf]

Supplementary information

## Wrapping/Unwrapping Transition of Double-Stranded DNA in DNA-Nanosphere Complexes Induced by Multivalent Anions

Aihua Chai, Yangwei Jiang, Yaoyang Zhang, Linli He, Dong Zhang, and Linxi Zhang

Table 1: Various anion and cation concentrations used in our simulations. Here  $C_s$  and  $C_s'$  represent anion and cation concentrations, respectively

|                            | $M^{1-}$ |      |       |       | $M^{2-}$ |       |       |       | $M^{3-}$ |       |       |       | $M^{4-}$ |       |       |       |
|----------------------------|----------|------|-------|-------|----------|-------|-------|-------|----------|-------|-------|-------|----------|-------|-------|-------|
| $C_s$ /mM                  | 30.5     | 61.0 | 91.5  | 443.9 | 30.5     | 61.0  | 91.5  | 216.9 | 30.5     | 61.0  | 91.5  | 144.7 | 30.5     | 61.0  | 91.5  | 108.5 |
| $C_s'$ /mM<br>( $M^{1+}$ ) | 61.0     | 91.5 | 121.9 | 464.6 | 91.5     | 152.3 | 213.3 | 464.6 | 121.9    | 213.3 | 304.7 | 464.6 | 152.3    | 274.2 | 396.1 | 464.6 |
